# Supplementary material for: Directional imbibition on a chemically patterned silicon micropillar array
Source: Royal Society of Chemistry journal article supplement (doi:10.1039/c5sm01746g), 2015-11-18
Supplement: c5sm01746g1.pdf [file c5sm01746g1.pdf]

## Supplementary information

### **Uni-, Bi- and Tri- Directional Imbibition of Water and Oils on a Chemically Patterned Silicon Micropillar Array**

Ville Jokinen<sup>a</sup>

<sup>a</sup> Aalto University, School of Chemical Technology, Micronova, Tietotie 3, 02150 Espoo, Finland

### Free energy of the imbibition front:

Here we derive the equations for the graphs 2e and 2f in the main text. As explained in the main text, a uniform wall instead of a row of micropillars is assumed. In addition, we assume that the shape of the meniscus is a straight line that touches the top of the previous row of pillars, and some spot  $x$  in the space between the pillar rows. This configuration is the one with the lowest surface energy, as either convex or concave curved meniscus would only have increased liquid-vapor surface energy with other parameters staying the same. This meniscus configuration is shown in Fig. 2a and 2c.

We mark as  $x$  the distance of the meniscus from the pillar row, so that  $x = 0 \mu\text{m}$  means the meniscus has not advanced at all from the pillar row and  $x = 20 \mu\text{m}$  means that the meniscus makes contact with the next pillar row, leading to the imbibition front advancing.

The surface free energy can then be written as:

$$U = w\gamma\sqrt{h^2 + x^2} - xw\gamma\cos\theta - hw\gamma\cos\theta, \quad (\text{S1})$$

where  $w$  is the width of the imbibition front,  $h$  the height of the pillars and  $\theta$  the contact angle. The first term is the liquid-vapour surface energy, the second term is the liquid-solid surface energy term that comes from the contact of the meniscus with the horizontal bottom surface and the third term the liquid-solid surface energy from the contact of the liquid with the vertical walls of the pillars.

We then set  $d = 10 \mu\text{m}$  so that in the advancing direction,  $\theta = \theta_1$  for  $0 \mu\text{m} < x < 10 \mu\text{m}$ , and  $\theta = \theta_2$  for  $10 \mu\text{m} < x < 20 \mu\text{m}$ . In the equilibrium direction,  $\theta = \theta_2$  for  $0 \mu\text{m} < x < 10 \mu\text{m}$ , and  $\theta = \theta_1$  for  $10 \mu\text{m} < x < 20 \mu\text{m}$ . We also drop the third term from the total surface energy calculation since it does not depend on  $x$  and would be an unnecessary constant in the potential energy.

The total surface energy per unit length in the advancing direction is:

$$U(x)/w = \gamma(\sqrt{h^2 + x^2} - x\cos\theta_1), \quad 0 \mu\text{m} < x < 10 \mu\text{m}, \quad (\text{S2})$$

$$U(x)/w = \gamma(\sqrt{h^2 + x^2} - 10 \mu\text{m} * \cos\theta_1 - (x - 10 \mu\text{m})\cos\theta_2), \quad 10 \mu\text{m} < x < 20 \mu\text{m}. \quad (\text{S3})$$

The total surface energy per unit length in the equilibrium direction is:

$$U(x)/w = \gamma(\sqrt{h^2 + x^2} - x\cos\theta_2), \quad 0 \mu\text{m} < x < 10 \mu\text{m}, \quad (\text{S4})$$

$$U(x)/w = \gamma(\sqrt{h^2 + x^2} - 10 \mu\text{m} * \cos\theta_2 - (x - 10 \mu\text{m})\cos\theta_1), \quad 10 \mu\text{m} < x < 20 \mu\text{m}. \quad (\text{S5})$$

The derivatives of S2-S5 are respectively:

$$d\left(\frac{U(x)}{w}\right)/dx = \gamma\left(\frac{x}{\sqrt{h^2 + x^2}} - \cos\theta_1\right), \quad 0 \mu\text{m} < x < 10 \mu\text{m}, \quad (\text{S6})$$

$$d\left(\frac{U(x)}{w}\right)/dx = \gamma\left(\frac{x}{\sqrt{h^2 + x^2}} - \cos\theta_2\right), \quad 10 \mu\text{m} < x < 20 \mu\text{m}. \quad (\text{S7})$$

$$d\left(\frac{U(x)}{w}\right)/dx = \gamma\left(\frac{x}{\sqrt{h^2 + x^2}} - \cos\theta_2\right), \quad 0 \mu\text{m} < x < 10 \mu\text{m}, \quad (\text{S8})$$

$$d\left(\frac{U(x)}{w}\right)/dx = \gamma\left(\frac{x}{\sqrt{h^2 + x^2}} - \cos\theta_1\right), \quad 10 \mu\text{m} < x < 20 \mu\text{m}. \quad (\text{S9})$$

### Directional imbibition types:

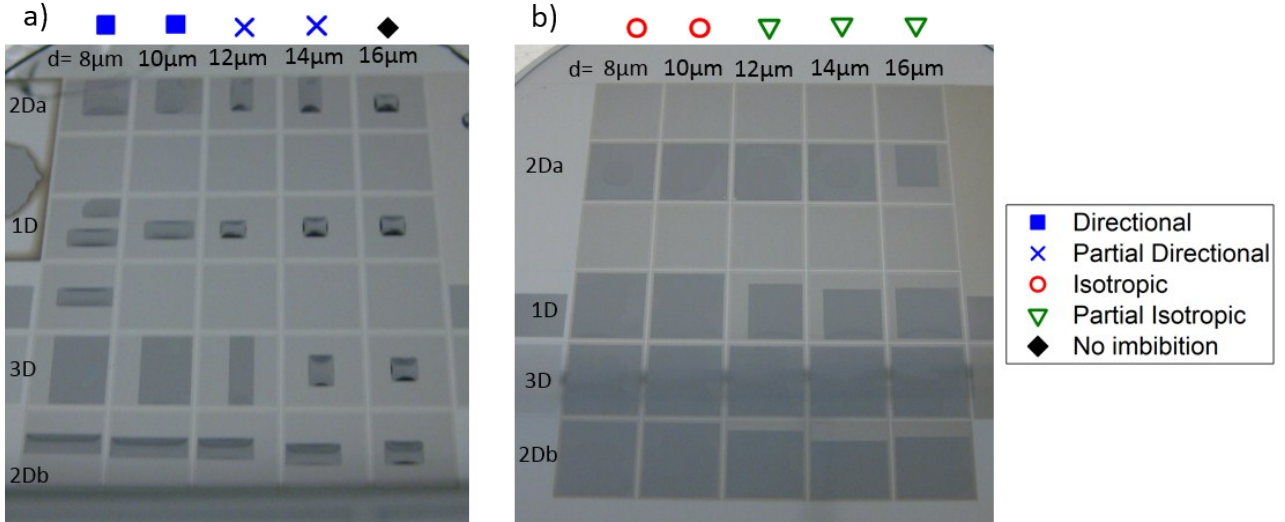

Supplementary Figure S1. End states of spontaneous directional imbibition experiments. Each figure represents 5 experiments (the columns) with different values of  $d$ . Each experiment with a given set of parameters looked at the four possible directional imbibition types (the rows). These figures correspond to the lowest row (a) and the third highest row (b) of Fig. 4 in the main text.

a) The parameters are  $h = 11.3 \mu\text{m}$ ,  $\vartheta_1 = 39^\circ$ . With  $d$  values of  $8 \mu\text{m}$  and  $10 \mu\text{m}$ , all four directional imbibition types fill as intended, and the experiment is classified as “directional”. In the experiments with  $d$  values  $12 \mu\text{m}$  and  $14 \mu\text{m}$ , the imbibition has proceeded into several of the intended directions, but pinned to others, so the experiment is classified “partial directional”. The experiment with  $d = 16 \mu\text{m}$  has only rectangular droplets, with no imbibition to any direction, so the experiment is classified “no imbibition”.

b) The parameters are  $h = 16.1 \mu\text{m}$ ,  $\vartheta_1 = 33^\circ$ . In the experiments with  $d$  values  $8 \mu\text{m}$  and  $10 \mu\text{m}$ , all structures are filled completely so the experiment is classified as “isotropic”. With  $d$  values between  $12 \mu\text{m}$  and  $16 \mu\text{m}$ , the structures are mostly completely filled, with only some of the intended dry directions unfilled, so the experiment is classified “partial isotropic”,

Directional imbibition of water:

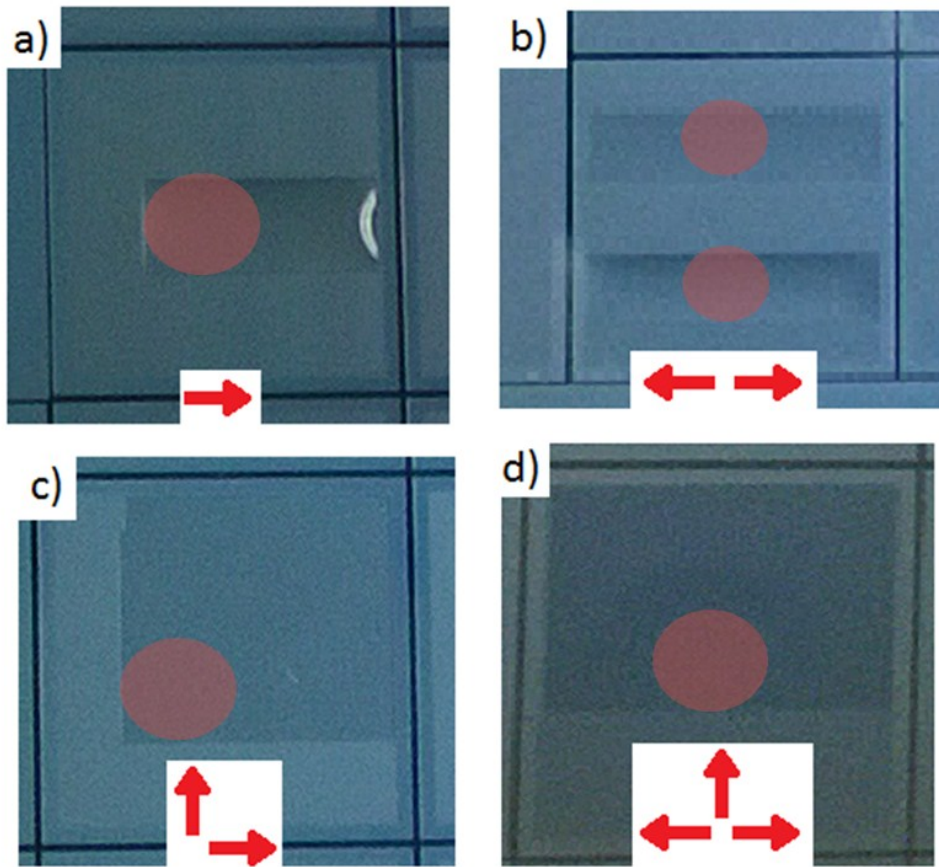

Supplementary Figure S2. Directional imbibition of water a) Unidirectional, b) Bidirectional (2Db), c) Bidirectional (2Da), d) Tridirectional. For all images, the parameters are  $h = 18.5 \mu\text{m}$ ,  $s = 20 \mu\text{m}$ ,  $\theta_1 = 52^\circ$ ,  $\theta_2 = 0^\circ$ . The parameter  $d$  is  $8 \mu\text{m}$  in a) and d), and  $10 \mu\text{m}$  in b) and c).

**Supplementary videos:**

*Supplementary Video S1. 1D filling process. The parameters are:  $d = 8\mu\text{m}$ ,  $h = 12.5\ \mu\text{m}$  and the liquid is a 2:1 mixture of hecdecane and dodecane.*

*Supplementary Video S2. 2Da filling process. The parameters are:  $d = 8\mu\text{m}$ ,  $h = 12.5\ \mu\text{m}$  and the liquid is hexadecane. Only first 5 seconds of the filling process are shown.*

*Supplementary Video S3. 2Db filling process. The parameters are:  $d = 8\mu\text{m}$ ,  $h = 12.5\ \mu\text{m}$  and the liquid is hexadecane.*

*Supplementary Video S4. 3D filling process. The parameters are:  $d = 8\mu\text{m}$ ,  $h = 12.5\ \mu\text{m}$  and the liquid is hecdecane. Only first 5 seconds of the filling process are shown.*
